# Supplementary material for: Self-assembly of PS-b-P4VP block copolymers of varying architectures in aerosol nanospheres
Source: Royal Society of Chemistry journal article supplement (doi:10.1039/c2sm26913a), 2012-12-05
Supplement: c2sm26913a.pdf [file c2sm26913a.pdf]

# Self-Assembly of PS-*b*-P4VP Block Copolymers of Varying Architectures in Aerosol Nanospheres

Antti Rahikkala,<sup>a</sup> Antti J. Soininen,<sup>a</sup> Janne Ruokolainen,<sup>a</sup> Raffaele Mezzenga,<sup>b</sup> Janne Raula\*<sup>a</sup> and Esko  
I. Kauppinen<sup>a</sup>

- a) Aalto University School of Science, Department of Applied Physics, P.O. Box 15100, 00076  
Aalto, Finland
- b) ETH Zurich, Food & Soft Materials, Department of Health Science & Technology,  
Schmelzbergstrasse 9, LFO, E23, 8092 Zürich, Switzerland

\*) Corresponding author

janne.raula@aalto.fi

Rahikkala *et al.*

### Supporting information

#### 1. The inner structure width distributions of PS(33k)-*b*-P4VP(8k), PS(48k)-*b*-P4VP(21k), and PS(20k)-*b*-P4VP(19k)

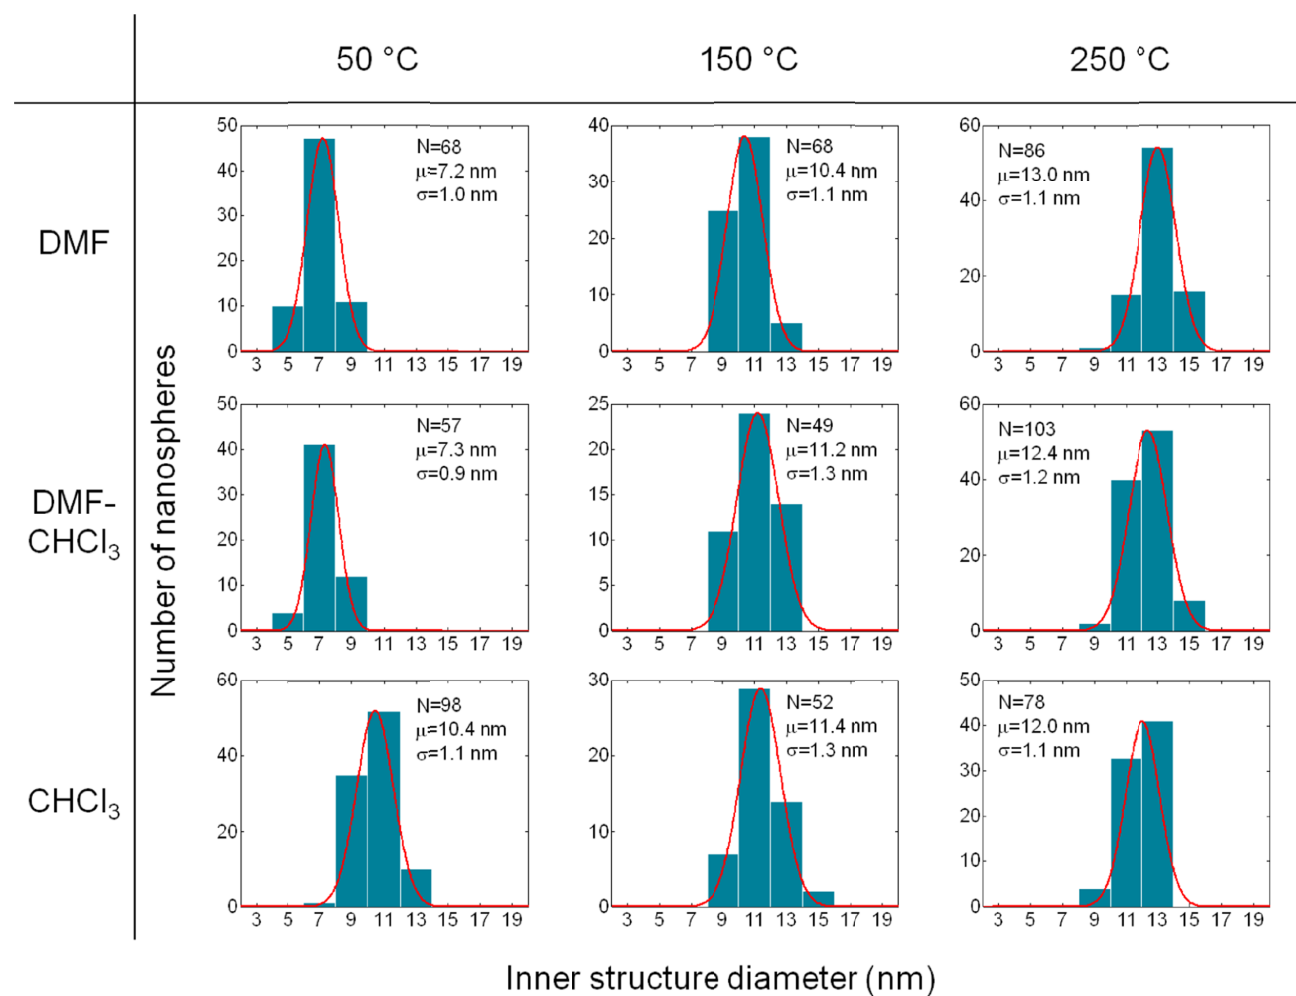

**Figure S1.** Diameter distributions of P4VP worm-like domains in PS(33k)-*b*-P4VP(8k) nanospheres obtained at different temperatures and from different solvents. The sample size is given by  $N$ ,  $\mu$  is the mean inner structure diameter, and  $\sigma$  is the standard deviation of the mean.

Rahikkala *et al.*

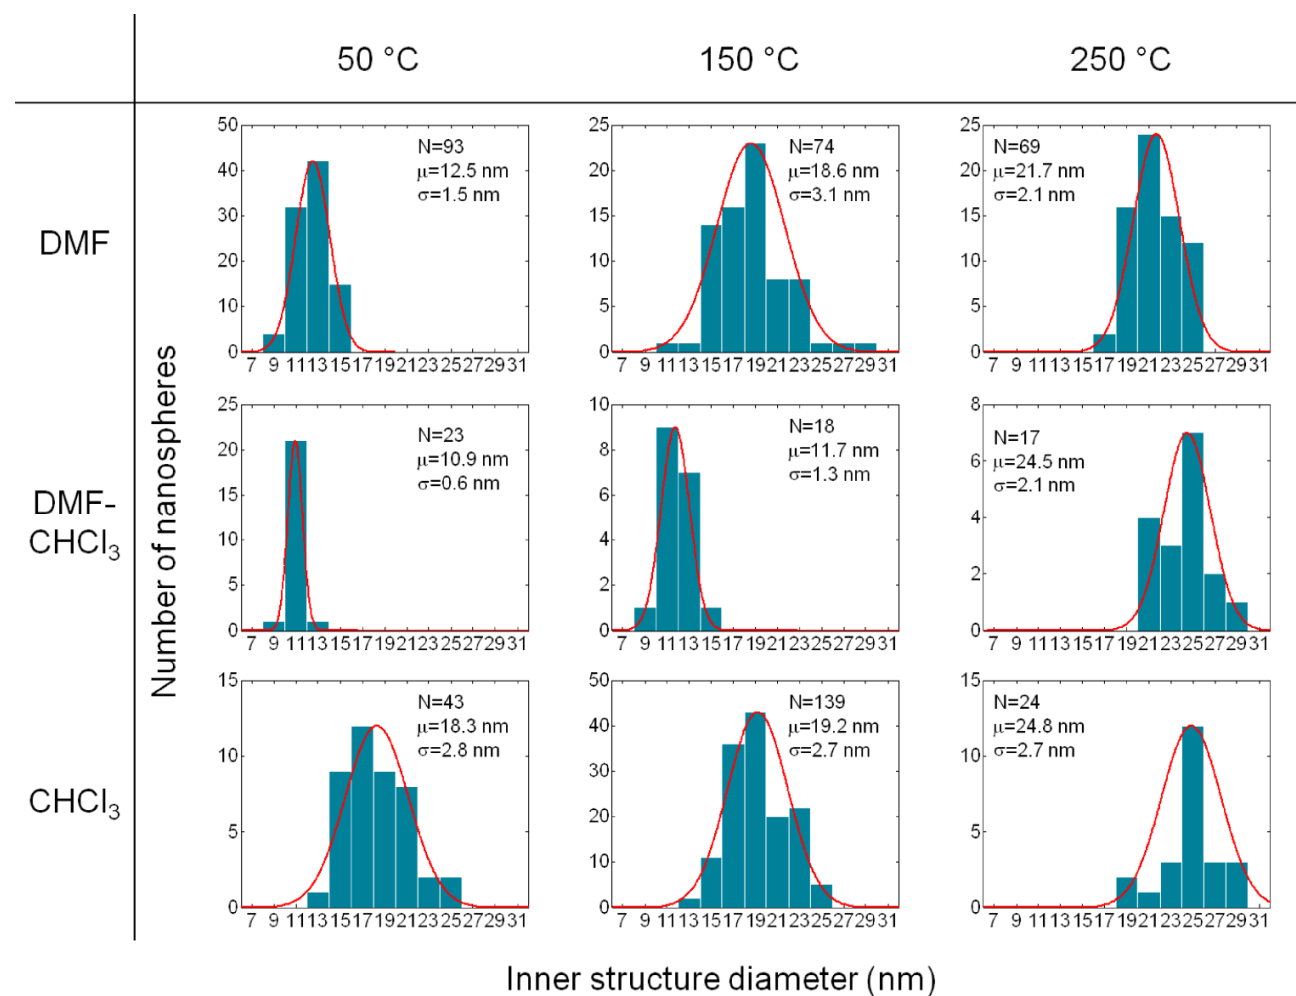

**Figure S2.** Diameter distributions of P4VP worm-like cylinder domains in PS(48k)-*b*-P4VP(21k) nanospheres obtained at different temperatures and from different solvents. The sample size is given by  $N$ ,  $\mu$  is the mean inner structure diameter, and  $\sigma$  is the standard deviation of the mean.

Rahikkala *et al.*

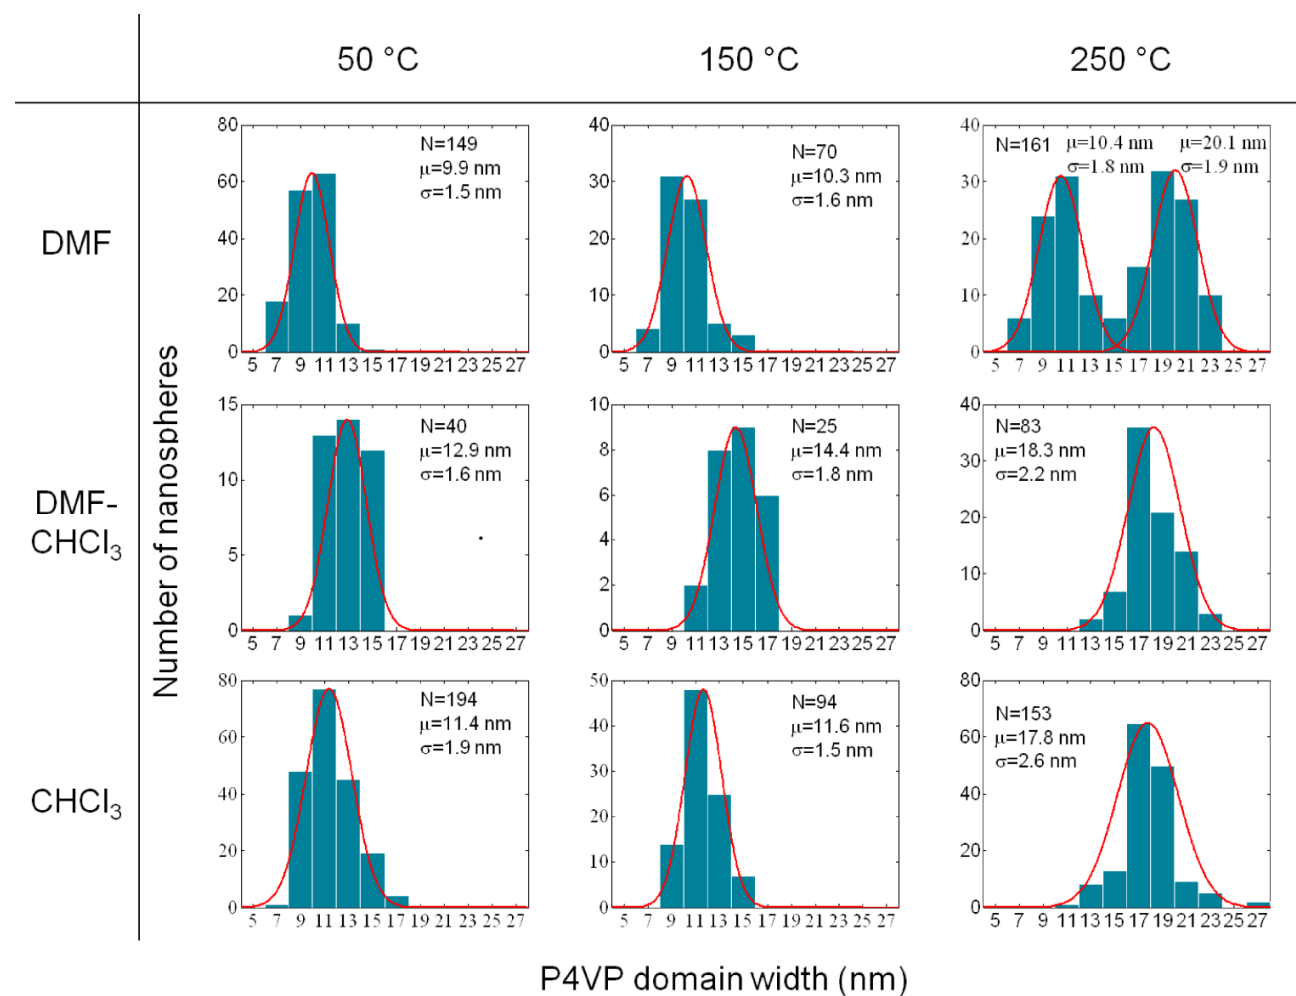

**Figure S3.** Width distributions of P4VP lamellar domains in PS(20k)-*b*-P4VP(19k) nanospheres obtained at different temperatures and from different solvents. The sample size is given by  $N$ ,  $\mu$  is the mean inner structure diameter, and  $\sigma$  is the standard deviation of the mean.
